# Supplementary material for: Fine-scale tracking reveals visual field use for predator detection and escape in collective foraging of pigeon flocks
Source: eLife. 2024 Sep 12;13:RP95549. doi: 10.7554/eLife.95549 (PMC11392528; doi:10.7554/eLife.95549)
Supplement: Figure 1—source data 1. [file elife-95549-fig1-data1.xlsx]

## Sheet: Sheet1
Trial	Event	Group	# individuals foveating	# individuals escaping	# individuals flying
1	1	1	6	5	4
1	2	1	9	9	7
1	1	2	5	4	4
1	2	2	8	9	9
2	1	1	9	9	6
2	2	1	10	10	6
2	1	2	6	9	9
2	2	2	8	9	8
3	1	1	10	9	10
3	2	1	10	10	6
3	1	2	8	9	9
3	2	2	9	10	8
4	1	1	8	10	8
4	2	1	9	10	7
4	1	2	9	10	6
4	2	2	5	10	10
5	1	1	9	9	6
5	2	1	10	10	6
5	1	2	10	8	0
5	2	2	9	9	6
6	1	1	8	10	7
6	2	1	10	6	0
6	1	2	8	10	6
6	2	2	8	10	9
