# Supplementary material for: Fine-scale tracking reveals visual field use for predator detection and escape in collective foraging of pigeon flocks
Source: eLife. 2024 Sep 12;13:RP95549. doi: 10.7554/eLife.95549 (PMC11392528; doi:10.7554/eLife.95549)
Supplement: Figure 3—source data 1. [file elife-95549-fig3-data1.xlsx]

## Sheet: Sheet1
Response	Type	Variable	# of obs.	Beta	Chi-sq	Df	p
Head-up	Test variable	Time period	477	0.27	237.71	1	<0.00001
	Control variable	Event	477	0.13	33.39	1	<0.00001
		Predator side (North)	477	0.00	0.05	1	0.832
		Sex (male)	477	-0.08	3.18	1	0.07433
Pecking rate (log-transformed)	Test variable	Time period	477	0.27	237.71	1	<0.00001
	Control variable	Event	477	0.13	33.39	1	<0.00001
		Predator side (North)	477	0.00	0.05	1	0.832
		Sex (male)	477	-0.08	3.18	1	0.07433
Saccade rate	Test variable	Time period	477	0.27	94.75	1	<0.00001
	Control variable	Event	477	0.09	5.49	1	0.01907
		Predator side (North)	477	-0.02	0.35	1	0.55565
		Sex (male)	477	-0.03	0.15	1	0.69753
Proportion of time looking at any monitor	Test variable	Time period	477	0.09	174.32	1	<0.00001
	Control variable	Event	477	0.02	6.09	1	0.01357
		Predator side (North)	477	0.00	0.01	1	0.93284
		Sex (male)	477	-0.04	2.47	1	0.11573
Proportion of time looking at any conspecific	Test variable	Time period	477	0.07	76.63	1	<0.00001
	Control variable	Event	477	0.00	0.09	1	0.77029
		Predator side (North)	477	-0.01	0.89	1	0.34477
		Sex (male)	477	0.04	2.48	1	0.11564
Distance to the closest monitor	Test variable	Time period	477	101.61	8.58	1	0.00339
	Control variable	Event	477	9.47	0.04	1	0.84643
		Predator side (North)	477	51.44	1.11	1	0.2922
		Sex (male)	477	8.38	0.01	1	0.91392
Distance to the nearest neighbor	Test variable	Time period	477	-31.11	8.15	1	0.0043
	Control variable	Event	477	6.07	0.16	1	0.69182
		Predator side (North)	477	26.76	3.03	1	0.08195
		Sex (male)	477	-50.13	1.84	1	0.17515
