# Supplementary material for: Fine-scale tracking reveals visual field use for predator detection and escape in collective foraging of pigeon flocks
Source: eLife. 2024 Sep 12;13:RP95549. doi: 10.7554/eLife.95549 (PMC11392528; doi:10.7554/eLife.95549)
Supplement: Table 1—source data 1. [file elife-95549-table1-data1.xlsx]

## Sheet: Sheet1
Variable type	Test Set	Variable name	description
Responses	1	Proportion of time foveating	Normalized frequency (normalized to a unit sum) at which each object of interest was observed within the foveal region (in the reprojection of the pigeon’s visual field), during the predator event.
	2.1-2.2	Latency to foveate (ms)	Latency of the first foveation on the looming stimulus or the predator hiding place after the onset of the looming stimulus and before the predator appears. To exclude the possibility of random gaze crossing, the first foveation was defined as instances lasting longer than 300 ms, which occurred at least 200 ms after the onset of the looming stimulus.
	3-4.1	Escaped before the looming stimulus offset or not (binary)	Whether the first overt escape response (either running away or flying) occurred before the looming stimulus offset (1) or not (0; i.e., either the pigeon responded after the looming stimulus offset or did not exhibit a detectable response).
	3-4.1	Latency to fly (ms)	Latency of the first flight after the onset of the looming stimulus
Predictors	1	Object type	Type of object: the monitor displaying the looming stimulus (relevant environmental cue), the monitor not displaying the looming stimulus (irrelevant environmental cue), or the nearest neighbor (conspecific)
	2.1	Behavior at the onset	Behavior at the onset of the looming stimulus (either head-up or feeding, other behaviors are not considered as they occurred much less often (20 occurrences out of 240 observations)
	2.1	Distance from the monitor (mm)	Distance to the monitor at the onset of the looming stimulus
	2.1	Distance to nearest neighbor (mm)	Distance to the nearest neighbor at the onset of the looming stimulus
	2.2	Head-up	Proportion of time the pigeon spent being head-up during the 2-min “before-cue” period
	2.2	Foveate on the monitor	Proportion time spent foveating on either monitor during the 2-min “before-cue” period
	2.2	Foveate on any pigeon	Proportion time spent foveating on any pigeon during the 2-min “before-cue” period
	2.2	Saccade rate (saccades/s)	Saccade rate when the pigeon is head-up during the 2-min “before-cue” period
	2.2	Pecking rate (pecks/s)	Pecking rate during the 2-min “before-cue” period
	3	Latency to foveate (ms)	See above
	4.1	First latency to foveate (ms)	The latency to foveate on the predator cue by the first pigeon during the looming stimulus presentation
