# Supplementary material for: Fine-scale tracking reveals visual field use for predator detection and escape in collective foraging of pigeon flocks
Source: eLife. 2024 Sep 12;13:RP95549. doi: 10.7554/eLife.95549 (PMC11392528; doi:10.7554/eLife.95549)
Supplement: Table 1—source data 2. [file elife-95549-table1-data2.xlsx]

## Sheet: Sheet1
Test	Formula
1	lmer(Logit_prop_in_foveal_region ~ Object_type + Event + Predator_side + Sex + (1|Pigeon_ID) + (1|Trial), Data)
2.1	lmer(Log_latency_foveate ~ scale(Distance_monintor) + scale(Distance_NN) + Behavior_at_onset + Event + Predator_side + Sex + (1|Pigeon_ID) + (1|Trial), Data)
2.2	lmer(Log_latency_foveate ~ scale(Prop_headup) + Event + Predator_side + Sex + (1|Pigeon_ID) + (1|Trial), Data)
	In other models, Prop_headup replaced with: Saccade_rate, Peck_rate, Prop_foveate_monitor or Prop_foveate_conspecific
3	glmer(Escape_before_cue_offset ~ scale(Latency_foveate) + Event + Predator_side + Sex + (1|Pigeon_ID) + (1|Trial), Data, family = binomial(link = "logit"))
	lmer(Latency_fly ~ scale(Latency_foveate) + Event + Predator_side + Sex + (1|Pigeon_ID) + (1|Trial), Data)
4.1	glmer(Escape_before_cue_offset ~ scale(First_latency_foveate) + Event + Predator_side + Sex + (1|Pigeon_ID) + (1|Trial), Data, family = binomial(link = "logit"))
	lmer(Latency_fly ~ scale(First_latency_foveate) + Event + Predator_side + Sex + (1|Pigeon_ID) + (1|Trial), Data)
