# Supplementary material for: Fine-scale tracking reveals visual field use for predator detection and escape in collective foraging of pigeon flocks
Source: eLife. 2024 Sep 12;13:RP95549. doi: 10.7554/eLife.95549 (PMC11392528; doi:10.7554/eLife.95549)
Supplement: Table 1—source data 3. [file elife-95549-table1-data3.xlsx]

## Sheet: Sheet1
Test	Response	Type	Variable	# of obs.	Beta	Chi-sq	Df	p
1	Proportion of time foveating on the objects of interest	Test variable	Object type (monitor not presenting stimulus)	720	-0.93	108.07	2	<0.00001
			Object type (Nearest neighbor)	720	-1.07	108.07	2	<0.00001
		Control variable	Event	720	0.19	4.86	1	0.02755
			Predator side (North)	720	-0.06	0.55	1	0.46013
			Sex (male)	720	-0.02	0.03	1	0.85906
2.1	Latency to foveate	Test variable	Distance from the monitor	163	0.14	1.20	1	0.27397
			Distance from NN	163	-0.03	0.05	1	0.82479
			Behavior (head-up)	163	-0.75	13.78	1	0.00021
		Control variable	Event	163	-0.21	1.30	1	0.25377
			Predator side (North)	163	0.09	0.19	1	0.66482
			Sex (male)	163	0.30	2.54	1	0.1107
2.2	Latency to foveate	Test variable	Proportion of time head-up	195	-0.35	15.90	1	0.00007
		Control variable	Event	195	-0.03	0.02	1	0.89658
			Predator side (North)	195	-0.14	0.80	1	0.36962
			Sex (male)	195	0.17	1.04	1	0.30679
	Latency to foveate	Test variable	Pecking rate	195	0.32	14.07	1	0.0002
		Control variable	Event	195	-0.08	0.19	1	0.6649
			Predator side (North)	195	-0.13	0.74	1	0.3904
			Sex (male)	195	0.25	2.41	1	0.1202
	Latency to foveate	Test variable	Proportion of time foveating on the monitor	195	-0.30	12.04	1	0.00052
		Control variable	Event	195	-0.14	0.72	1	0.39587
			Predator side (North)	195	-0.11	0.55	1	0.45892
			Sex (male)	195	0.20	1.44	1	0.22948
	Latency to foveate	Test variable	Saccade rate	195	-0.26	9.85	1	0.0017
		Control variable	Event	195	-0.20	1.54	1	0.2139
			Predator side (North)	195	-0.15	0.97	1	0.32492
			Sex (male)	195	0.25	2.37	1	0.12403
	Latency to foveate	Test variable	Proportion of time foveating on conspecifics	195	0.02	0.06	1	0.81159
		Control variable	Event	195	-0.30	3.42	1	0.06454
			Predator side (North)	195	-0.10	0.44	1	0.50919
			Sex (male)	195	0.29	2.90	1	0.08863
3	Latency to escape	Test variable	Latency to foveate	201	-0.03	0.03	1	0.8716
		Control variable	Event	201	-0.04	0.01	1	0.92304
			Predator side (North)	201	1.57	18.00	1	0.00002
			Sex (male)	201	-0.58	1.16	1	0.28183
	Latency to fly	Test variable	Latency to foveate	201	214.61	6.49	1	0.01084
		Control variable	Event	201	77.75	0.32	1	0.57313
			Predator side (North)	201	-320.20	5.01	1	0.02523
			Sex (male)	201	49.33	0.06	1	0.80554
4.1	Latency to escape	Test variable	First latency to foveate	210	-0.70	3.66	1	0.05586
		Control variable	Event	210	-0.07	0.03	1	0.86216
			Predator side (North)	210	1.49	14.93	1	0.00011
			Sex (male)	210	-0.47	0.78	1	0.37693
	Latency to fly	Test variable	First latency to foveate	210	340.20	17.32	1	0.00003
		Control variable	Event	210	205.62	2.66	1	0.10316
			Predator side (North)	210	-276.02	4.50	1	0.03396
			Sex (male)	210	-57.44	0.18	1	0.6706
4.2	Latency to run	Test variable	Trial	240	(a)	37.49	1	<0.00001
			Event	240	-260.26	1.37	1	0.24161
			Predator side (North)	240	-1243.29	30.25	1	<0.00001
			Sex (male)	240	247.14	0.35	1	0.55150
	Latency to fly	Test variable	Trial	240	(a)	40.00	1	<0.00001
			Event	240	20.48	0.03	1	0.86097
			Predator side (North)	240	-202.39	2.65	1	0.10364
			Sex (male)	240	83.62	0.26	1	0.60673
