# Supplementary material for: Fine-scale tracking reveals visual field use for predator detection and escape in collective foraging of pigeon flocks
Source: eLife. 2024 Sep 12;13:RP95549. doi: 10.7554/eLife.95549 (PMC11392528; doi:10.7554/eLife.95549)
Supplement: Table 1—source data 4. [file elife-95549-table1-data4.xlsx]

## Sheet: Sheet1
Variable	Repeatability estimate	p-value
Latency to foveate (log-transformed)	0.011	0.359
Latency to escape	0.145	<0.00001
Latency to fly	0.0525	0.062
Response time delay between foveation and flight	0.128	0.0404
Flew or not	0.219	<0.00001
Proportion of time head-up	0.166	<0.00001
Saccade rate	0.126	0.00014
Pecking rate (log-transformed)	0.0919	0.00507
Proportion foveate on the predator cue	0.144	0.00001
Proportion foveate on conspecifics	0.132	0.00007
Distance from the monitor	<0.0001	1
Distance from nearest neighbor	0.0644	0.0362
