# Supplementary material for: Fine-scale tracking reveals visual field use for predator detection and escape in collective foraging of pigeon flocks
Source: eLife. 2024 Sep 12;13:RP95549. doi: 10.7554/eLife.95549 (PMC11392528; doi:10.7554/eLife.95549)
Supplement: Table 2—source data 2. [file elife-95549-table2-data2.xlsx]

## Sheet: Sheet1
	Inter-rater reliability			Sample number	Metric	Comparison method
Behavior	HR1-ACC	HR2-ACC	HR1-HR2
Pecking	0.983	0.984	0.987	60	count	ICC
Grooming	1	0.96	0.96	50	presence-absence	Cohen's Kappa
Courting	0.88	0.8	0.838	50	presence-absence	Cohen's Kappa
Flying	0.933	1	0.933	30	presence-absence	Cohen's Kappa
